# Supplementary material for: Sex-Specific Microglial Responses to Glucocerebrosidase Inhibition: Relevance to GBA1-Linked Parkinson’s Disease
Source: MDPI journal article supplement (doi:10.3390/cells12030343), 2023-01-17
Supplement: s1 [file s1]

**Title: Sex-Specific Microglial Responses to Glucocerebrosidase Inhibition:  
Relevance to GBA1-Linked Parkinson's Disease**

**Authors**

Electra Brunialti <sup>1</sup>, Alessandro Villa <sup>1</sup>, Marco Toffoli <sup>2,3</sup>, Sara Lucas Del Pozo <sup>2,3</sup>, Nicoletta Rizzi <sup>4</sup>,  
Clara Meda <sup>1</sup>, Adriana Maggi <sup>5</sup>, Anthony H. V. Schapira <sup>2,3</sup> and Paolo Ciana <sup>1,\*</sup>.

**This PDF file includes:**

Supplementary table S1

Supplementary figure S1

**Supplementary table S1:** cluster generated for each couple of parameters.

| COUPLE OF PARAMETERS  |                         | CLUSTERS GENERATED    |
|-----------------------|-------------------------|-----------------------|
| Area-Motility         | Area↓ Motility↓         | Small & Static        |
|                       | Area↓ Motility↑         | Small & Motile        |
|                       | Area↑ Motility↓         | Big & Static          |
|                       | Area↑ Motility↑         | Big & Motile          |
| CV% Solidity-Motility | CV% Solidity↓ Motility↓ | Steady & Static       |
|                       | CV% Solidity↓ Motility↑ | Steady & Motile       |
|                       | CV% Solidity↑ Motility↓ | Variable & Static     |
|                       | CV% Solidity↑ Motility↑ | Variable & Motile     |
| CV Area - Solidity    | CV Area↓ - Solidity↓    | Inactive & Complex    |
|                       | CV Area ↓- Solidity↑    | Inactive & Simple     |
|                       | CV Area↑ - Solidity↓    | Contractile & Complex |
|                       | CV Area↑ - Solidity↑    | Contractile & Simple  |
| Solidity - Area       | Solidity↓ Area↓         | Complex & Small       |
|                       | Solidity ↓ Area↑        | Complex & Big         |
|                       | Solidity ↑ Area↓        | Simple & Small        |
|                       | Solidity↑ Area↑         | Simple & Big          |
| Solidity - Motility   | Solidity↓ Motility↓     | Complex & Static      |
|                       | Solidity↓ Motility↑     | Complex & Motile      |
|                       | Solidity↑ Motility↓     | Simple & Static       |
|                       | Solidity ↑ Motility↑    | Simple & Motile       |
| Rotation - Motility   | Rotation↓ Motility↑     | Stationary & Static   |
|                       | Rotation↓ Motility↓     | Stationary & Motile   |
|                       | Rotation ↑ Motility↑    | Rotant & Static       |
|                       | Rotation ↑ Motility↓    | Rotant & Motile       |

↓ values under the median; ↑ values over the median

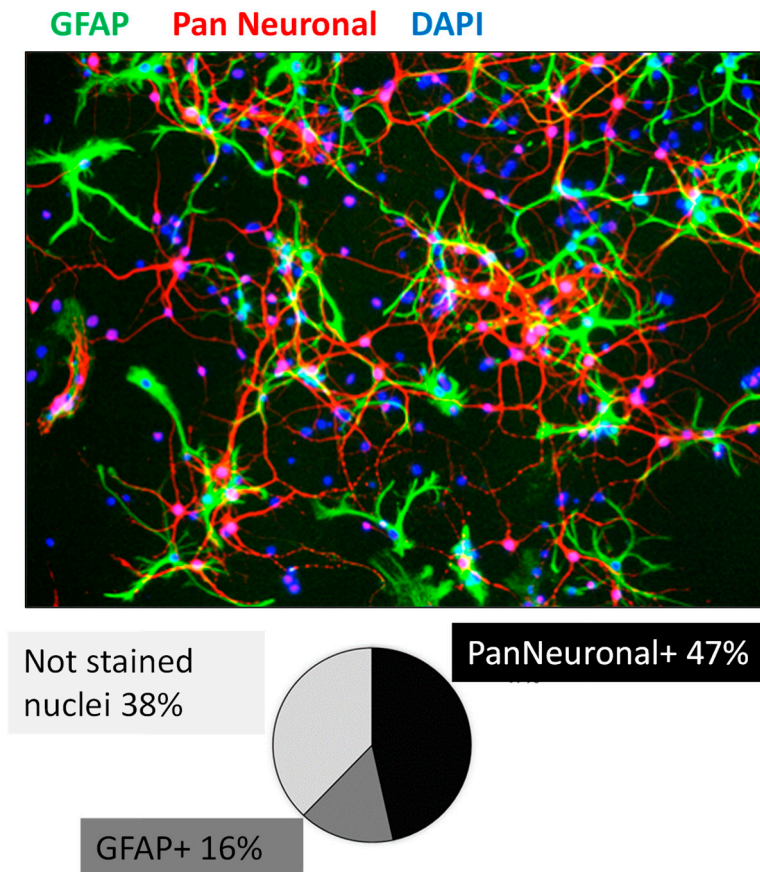

**Supplementary figure S1:** primary cortical cells layer composition to supports microglial function. Top) representative fluorescent image of the cortical neuronal cultures. green= GFAP marker, red=pan-neuronal marker, blue=DAPI. Bottom) the percentage of cell composition is reported with respect to the total nucleus counted.
