# Supplementary material for: Sex-Specific Microglial Responses to Glucocerebrosidase Inhibition: Relevance to GBA1-Linked Parkinson’s Disease
Source: Cells. 2023 Jan 17;12(3):343. doi: 10.3390/cells12030343 (PMC9913749; doi:10.3390/cells12030343)
Supplement: Supplementary file 1 [file cells-12-00343-s001.zip]

Archive with 5 entries (5 files):
- Brunialti et al Supplementary Material.pdf
- Brunialti et al Supplementary Movie legends rev.pdf
- Video 1.mp4
- Video 2.mp4
- Video 3.mp4
